# Supplementary material for: The effect of mutation in the stem of the MicroROSE thermometer on its thermosensing ability: insights from molecular dynamics simulation studies
Source: Royal Society of Chemistry journal article supplement (doi:10.1039/d2ra00169a), 2022-01-01
Supplement: d2ra00169a1.pdf [file d2ra00169a1.pdf]

## Supporting information:

| Description of the system | Number of nucleotides | Number of sodium counterions | Number of water molecules |
|---------------------------|-----------------------|------------------------------|---------------------------|
| Modelled MicroROSE        | 29                    | 28                           | 4081                      |
| $\Delta$ G10 MicroROSE    | 28                    | 27                           | 3573                      |
| Mutated A5U MicroROSE     | 29                    | 28                           | 4081                      |
| Mutated U25A MicroROSE    | 29                    | 28                           | 4081                      |

Table ST1 Description of four starting structures investigated in this study.

| Nucleotide numbers associated with steps for modelled MicroROSE | Nucleotide numbers associated with steps for $\Delta$ G10 MicroROSE | Nucleotide numbers associated with steps for mutated A5U MicroROSE | Nucleotide numbers associated with steps for mutated U25A MicroROSE |
|-----------------------------------------------------------------|---------------------------------------------------------------------|--------------------------------------------------------------------|---------------------------------------------------------------------|
| G1:C29-G2:C28                                                   | G1: C29-G2:C28                                                      | G1:C29-G2:C28                                                      | G1:C29-G2:C28                                                       |
| G2:C28-C3:G27                                                   | G2: C28-C3:G27                                                      | G2:C28-C3:G27                                                      | G2:C28-C3:G27                                                       |
| C3:G27-C4:G26                                                   | C3: G27-C34:G26                                                     | C3:G27-C4:G26                                                      | C3:G27-C4:G26                                                       |
| C4:G26-A5:U25                                                   | C4: G26-A5:U25                                                      | C4:G26-U5:U25                                                      | C4:G26-A5:A25                                                       |
| U8:A22-U9:G21                                                   | U8:A22-9U:21G                                                       | U8:A22-U9:G21                                                      | U8:A22-U9:G21                                                       |
| C11:G20-U12:A19                                                 | U9:G21-C11:G20                                                      | C11:G20-U12:A19                                                    | C11:G20-U12:A19                                                     |
| U12:A19-C13:G18                                                 | C11:G20-U12:A19                                                     | U12:A19-C13:G18                                                    | U12:A19-C13:G18                                                     |
|                                                                 | U12:A19-C13:G1                                                      |                                                                    |                                                                     |

**Table ST2** Presents nucleotide numbers associated with base paired dinucleotide steps for modelled MicroROSE,  $\Delta$ G10 MicroROSE, mutated U5A MicroROSE and mutated U25A MicroROSE. (Considered only consecutive stacked base pairs are considered).

| Nucleotide numbers associated with steps | VDW (kcal/mol) | ELEC (kcal/mol) | Total stacking energy at 315K | VDW (kcal/mol) | ELEC (kcal/mol) | Total stacking energy at 350K | VDW (kcal/mol) | ELEC (kcal/mol) | Total stacking energy at 400K |
|------------------------------------------|----------------|-----------------|-------------------------------|----------------|-----------------|-------------------------------|----------------|-----------------|-------------------------------|
| G1:C29-G2:C28                            | -10.53         | -4.41           | -14.94±0.11                   | -10.30         | -4.28           | -14.58±0.44                   | -9.70          | -3.78           | -12.48±1.08                   |
| G2:C28-C3:G27                            | -10.43         | -4.03           | -14.46±0.18                   | -10.21         | -3.90           | -14.11±0.56                   | -9.62          | -3.75           | -13.37±1.11                   |
| C3:G27-C4:G26                            | -9.72          | -3.80           | -13.52±0.26                   | -9.61          | -3.75           | -13.36±0.37                   | -8.88          | -2.71           | -11.59±0.98                   |
| C4:G26-A5:U25                            | -9.03          | -3.61           | -12.64±0.31                   | -8.91          | -3.54           | -12.45±0.31                   | -8.18          | -2.05           | -11.23±1.11                   |
| U8:A22-U9:G21                            | -9.50          | -2.80           | -12.30±0.24                   | -9.38          | -2.69           | -12.07±0.45                   | -7.01          | -1.77           | -8.78±1.08                    |
| C11:G20-U12:A19                          | -9.20          | -2.95           | -12.15±0.27                   | -9.03          | -2.81           | -11.84±0.39                   | -6.59          | -1.38           | -7.97±1.23                    |
| U12:A19-C13:G18                          | -9.10          | -2.91           | -12.01±0.34                   | -8.95          | -2.77           | -11.72±0.45                   | -6.50          | -1.25           | -7.75±1.16                    |

**Table ST3** Average stacking energy (kcal/mol) of the constituent dinucleotide steps for modelled MicroROSE system where total stacking energy is composed of van der Waals and electrostatic energy and has been calculated over the last 25 ns of simulation run.

| Nucleotide numbers associated with steps | VDW (Kcal/mol) | ELEC (Kcal/mol) | Total stacking energy at 315K | VDW (Kcal/mol) | ELEC (Kcal/mol) | Total stacking energy at 350K | VDW (Kcal/mol) | ELEC (Kcal/mol) | Total stacking energy at 400K |
|------------------------------------------|----------------|-----------------|-------------------------------|----------------|-----------------|-------------------------------|----------------|-----------------|-------------------------------|
| G1: C29-G2:C28                           | -10.56         | -4.46           | -15.02±0.11                   | -10.57         | -4.36           | -14.93±0.45                   | -10.30         | -4.28           | -14.58±0.76                   |
| G2: C28-C3:G27                           | -10.57         | -4.32           | -14.89±0.21                   | -10.50         | -4.25           | -14.75±0.48                   | -10.18         | -4.01           | -14.19±0.67                   |
| C3: G27-C34:G26                          | -9.82          | -3.90           | -13.72±0.08                   | -9.75          | -3.85           | -13.60±0.41                   | -9.61          | -3.36           | -12.97±0.71                   |
| C4: G26-A5:U25                           | -9.38          | -3.82           | -13.20±0.17                   | -9.30          | -3.65           | -12.95±0.51                   | -9.01          | -2.98           | -11.99±0.77                   |
| U8:A22-9U:21G                            | -9.78          | -2.83           | -12.61±0.21                   | -9.48          | -2.75           | -12.23±0.54                   | -8.61          | -1.81           | -10.42±0.68                   |
| U9:G21-C11:G20                           | -9.50          | -2.74           | -12.24±0.16                   | -9.40          | -2.60           | -12.00±0.52                   | -8.42          | -1.67           | -10.09±0.78                   |
| C11:G20 - U12:A19                        | -9.24          | -2.98           | -12.22±0.25                   | -9.10          | -2.83           | -11.93±0.61                   | -7.75          | -1.78           | -9.53±0.72                    |
| U12:A19 -C13:G1                          | -9.20          | -3.00           | -12.20±0.28                   | -9.05          | -2.82           | -11.87±0.65                   | -7.79          | -1.72           | -9.51±0.78                    |

**Table ST4** Average stacking energy (kcal/mol) of the constituent dinucleotide steps for  $\Delta$ G10 MicroROSE system where total stacking energy is composed of van der Waals and electrostatic energy and has been calculated over the last 25 ns of simulation run.

| Nucleotide numbers associated with steps | VDW (kcal/mol) | ELEC (kcal/mol) | Total stacking energy at 315K | VDW (kcal/mol) | ELEC (kcal/mol) | Total stacking energy at 350K | VDW (kcal/mol) | ELEC (kcal/mol) | Total stacking energy at 400K |
|------------------------------------------|----------------|-----------------|-------------------------------|----------------|-----------------|-------------------------------|----------------|-----------------|-------------------------------|
| G1:C29-G2:C28                            | -10.52         | -4.41           | -14.93±0.14                   | -10.28         | -4.21           | -14.49±0.61                   | -9.27          | -3.58           | -11.85±1.21                   |
| G2:C28-C3:G27                            | -10.41         | -4.01           | -14.42±0.17                   | -10.15         | -3.80           | -13.95±0.55                   | -9.43          | -3.24           | -12.67±1.34                   |
| C3:G27-C4:G26                            | -9.65          | -3.55           | -13.20±0.21                   | -9.55          | -3.38           | -12.93±0.48                   | -8.15          | -2.10           | -10.25±1.41                   |
| C4:G26-U5:U25                            | -8.88          | -3.50           | -12.38±0.24                   | -8.74          | -3.35           | -12.09±0.68                   | -7.70          | -1.80           | -9.50±1.28                    |
| U8:A22-U9:G21                            | -9.35          | -2.68           | -12.03±0.17                   | -9.12          | -2.51           | -11.63±0.63                   | -6.93          | -1.68           | -8.61±1.38                    |
| C11:G20 - U12:A19                        | -9.08          | -2.80           | -11.88±0.29                   | -8.88          | -2.55           | -11.43±0.54                   | -6.43          | -1.30           | -7.73±1.35                    |
| U12:A19 - C13:G18                        | -8.98          | -2.77           | -11.75±0.31                   | -8.71          | -2.58           | -11.29±0.71                   | -6.36          | -1.18           | -7.54±1.45                    |

**Table ST5** Average stacking energy (kcal/mol) of the constituent dinucleotide steps for mutated A5U MicroROSE system where total stacking energy is composed of van der Waals and electrostatic energy and has been calculated over the last 25 ns of simulation run.

| Nucleotide numbers associated with steps | VDW (kcal/mol) | ELEC (kcal/mol) | Total stacking energy at 315K | VDW (kcal/mol) | ELEC (kcal/mol) | Total stacking energy at 350K | VDW (kcal/mol) | ELEC (kcal/mol) | Total stacking energy at 400K |
|------------------------------------------|----------------|-----------------|-------------------------------|----------------|-----------------|-------------------------------|----------------|-----------------|-------------------------------|
| G1:C29-G2:C28                            | -10.51         | -4.40           | -14.91±0.21                   | -10.18         | -4.16           | -14.34±0.40                   | -8.48          | -2.80           | -11.28±1.11                   |
| G2:C28-C3:G27                            | -10.28         | -3.97           | -14.25±0.16                   | -10.11         | -3.74           | -13.85±0.54                   | -9.31          | -3.02           | -12.33±1.18                   |
| C3:G27-C4:G26                            | -9.58          | -3.51           | -13.09±0.23                   | -9.37          | -3.40           | -12.77±0.38                   | -8.01          | -1.88           | -9.89±1.03                    |
| C4:G26-A5:A25                            | -8.78          | -3.45           | -12.23±0.18                   | -8.52          | -3.17           | -11.69±0.65                   | -7.58          | -1.75           | -9.33±1.21                    |
| U8:A22-U9:G21                            | -9.30          | -2.60           | -11.90±0.28                   | -9.01          | -2.32           | -11.33±0.59                   | -5.80          | -1.32           | -7.12±1.18                    |
| C11:G20 - U12:A19                        | -8.98          | -2.70           | -11.68±0.13                   | -8.25          | -2.49           | -10.74±0.71                   | -5.32          | -1.15           | -6.47±1.31                    |
| U12:A19 - C13:G18                        | -8.92          | -2.68           | -11.60±0.31                   | -8.10          | -2.38           | -10.48±0.78                   | -5.11          | -1.01           | --6.12±1.35                   |

**Table ST6** Average stacking energy (kcal/mol) of the constituent dinucleotide steps for mutated U25A MicroROSE system where total stacking energy is composed of van der Waals and electrostatic energy and has been calculated over the last 25 ns of simulation run.

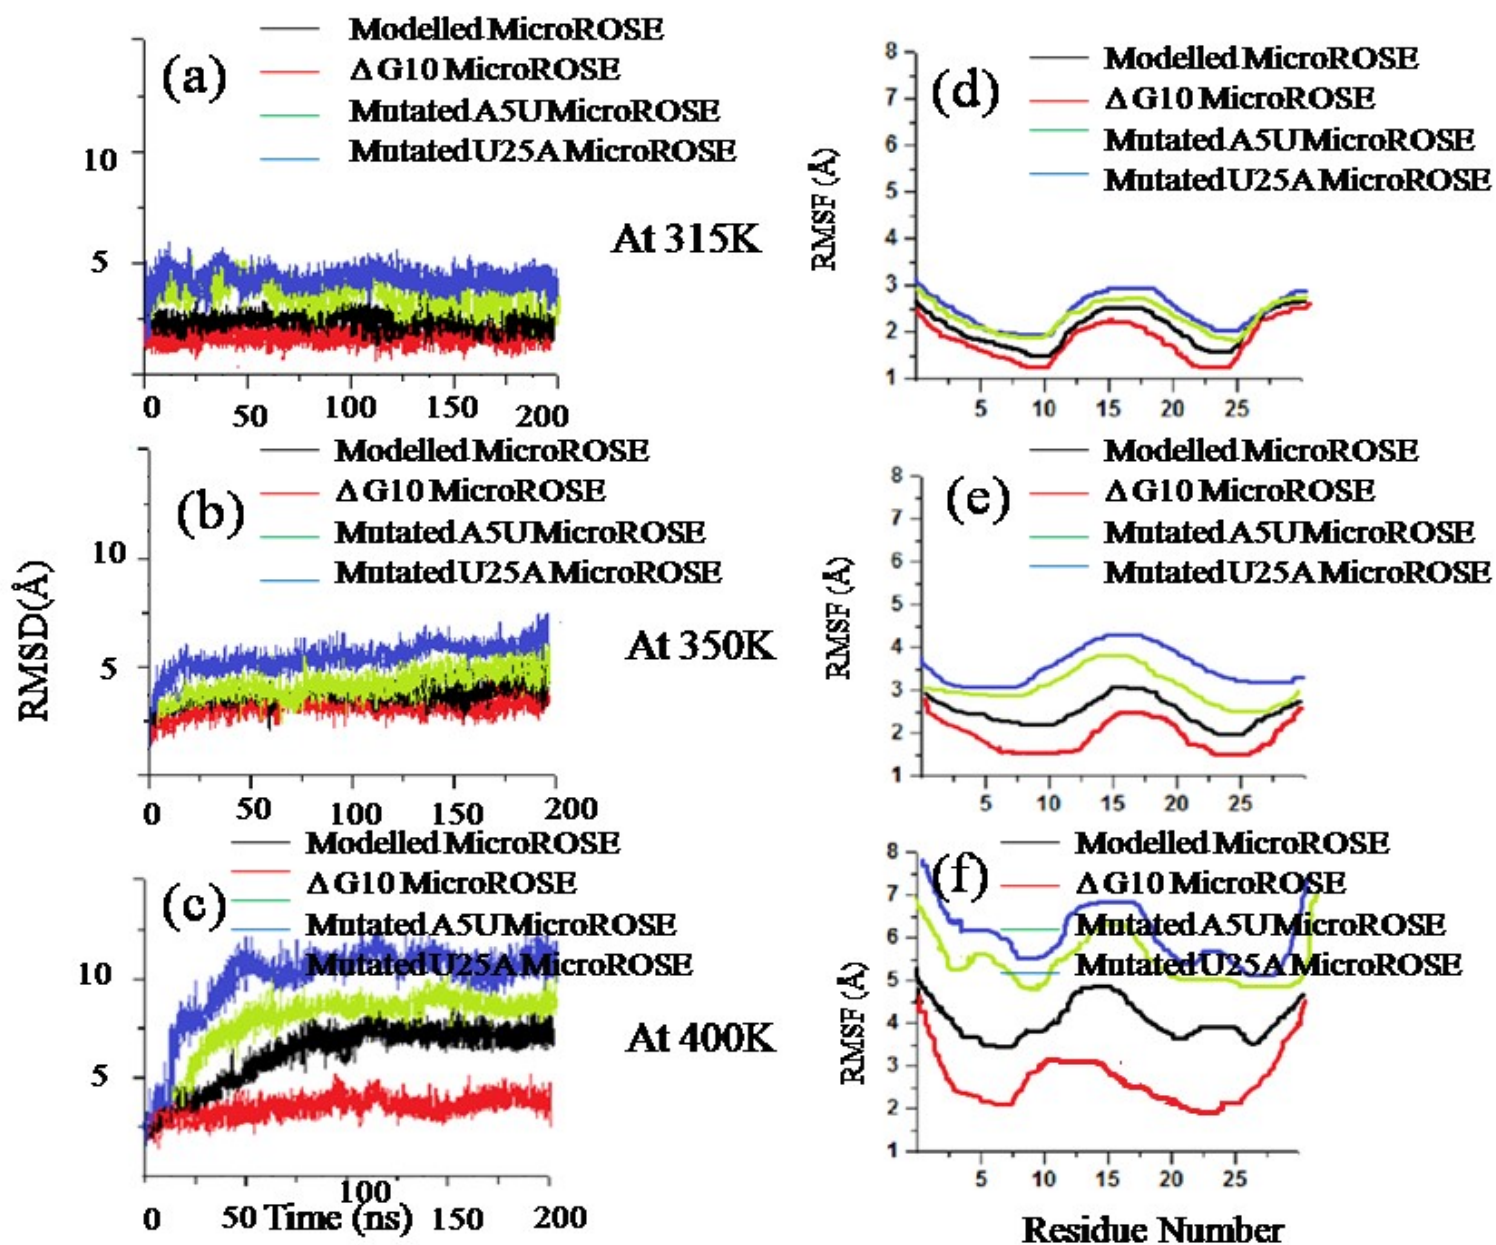

**Fig. S1** Root mean square deviation (RMSD) and root mean square fluctuation (RMSF) of four simulated systems with different starting velocities (S2 simulation). Backbone RMSD of four systems during the 200 ns simulation are calculated with respect to their equilibrated structures, plotted against time (a) At 315 K, (b) At 350 K and (c) At 400 K. Backbone RMSF of each residue for four systems is plotted (d) At 315 K, (e) At 350 K and (f) At 400 K.

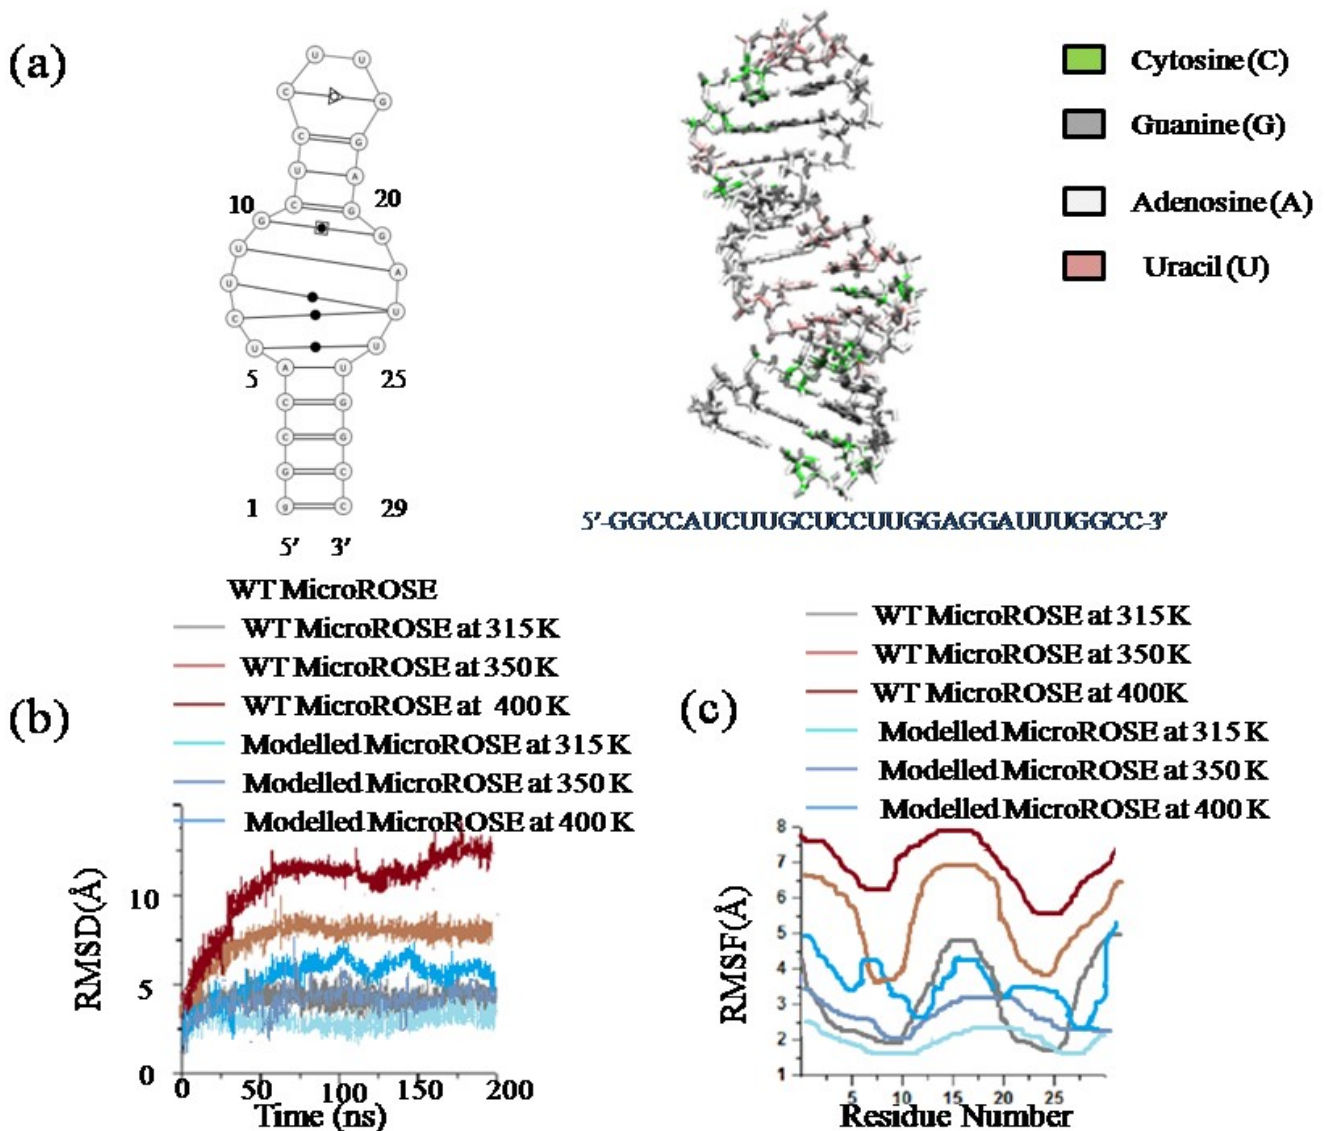

**Fig. S2** (a) Dynamic bonds representation of WT MicroROSE system with sequence, schematic secondary structure representation of the system (left hand side) as determined by the RNA pdbee 2.0 programme. (b) Backbone RMSD of the WT MicroROSE and modelled MicroROSE systems during the 200 ns simulation are calculated with respect to the equilibrated structures, plotted against time at three temperatures (at 315 K, 350 K and 400 K). (c) Backbone RMSF of each residue of WT MicroROSE and modelled MicroROSE system is plotted against time at three temperatures (at 315 K, 350 K and 400 K).

## Contact map at 315K

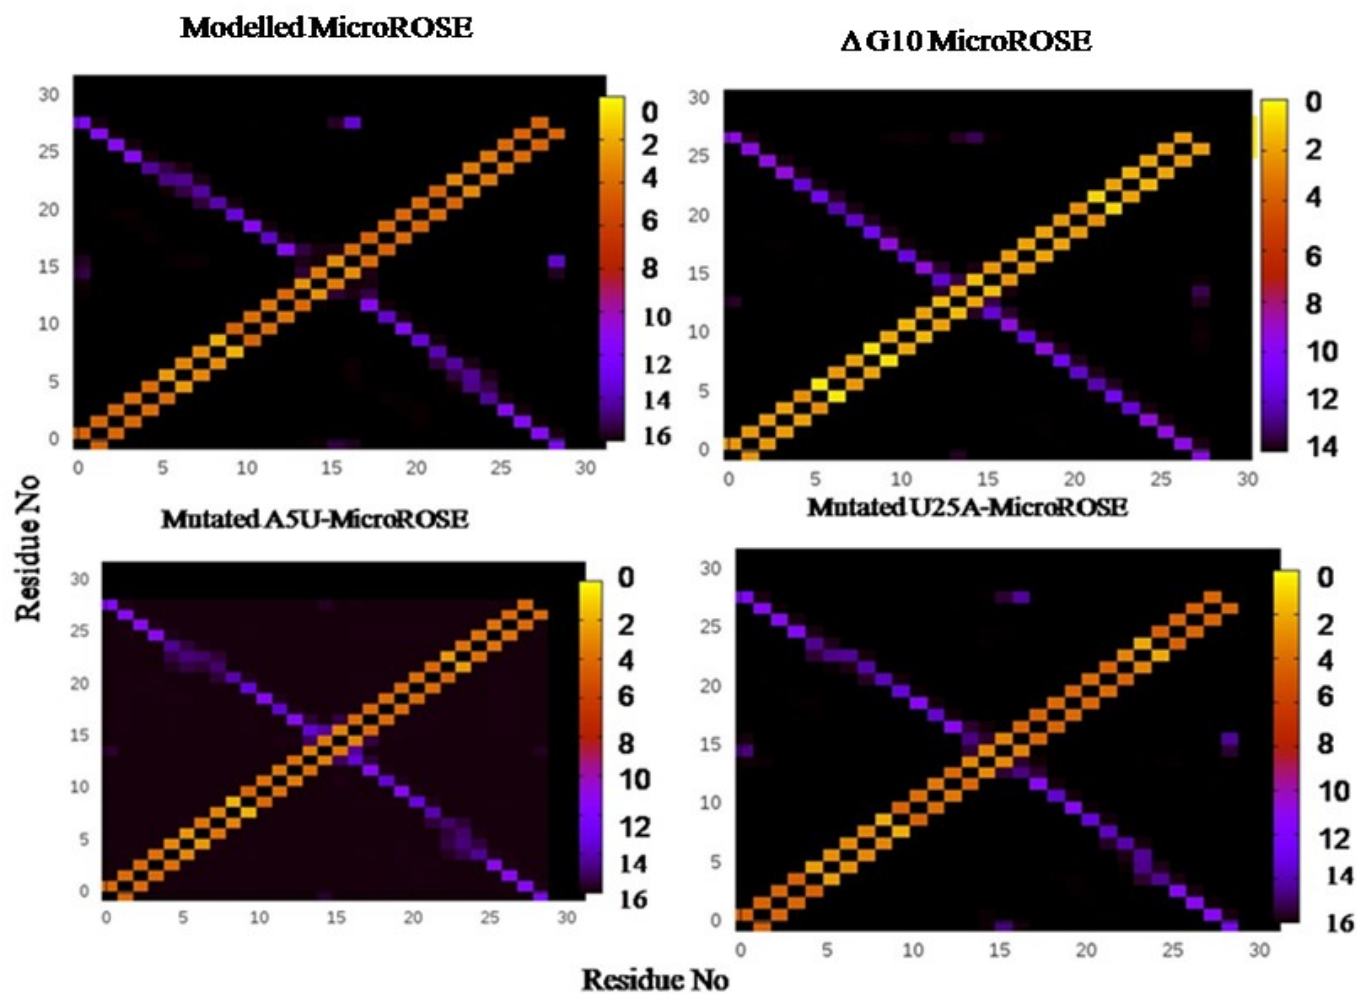

**Fig. S3** Residue wise contact map for the four simulated systems (modelled MicroROSE,  $\Delta G10$  MicroROSE, mutated A5U MicroROSE and mutated U25A MicroROSE) at 315K.



## Contact map at 350K

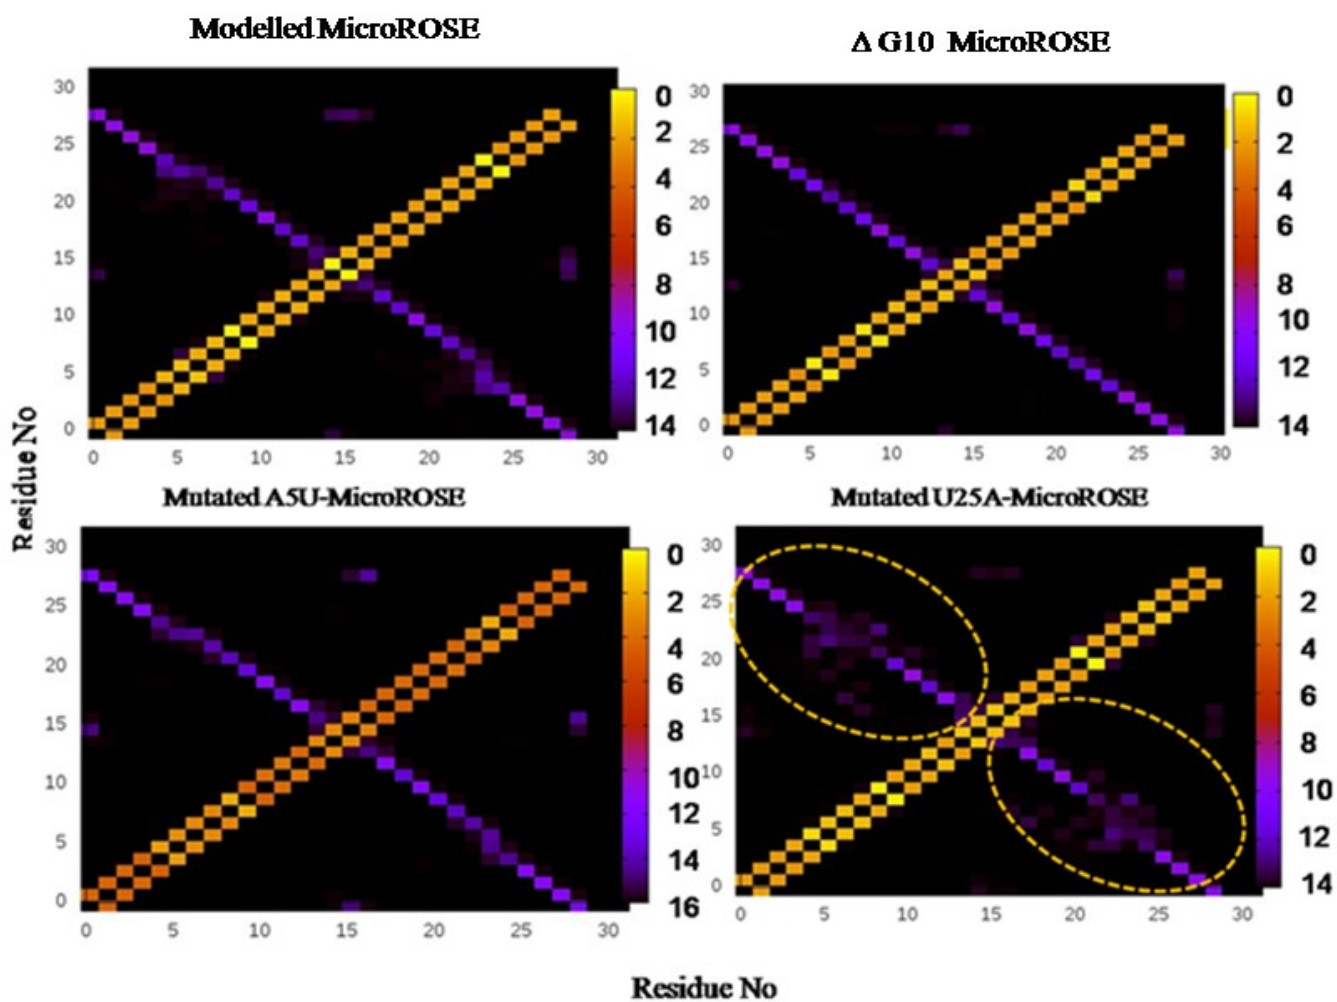

**Fig. S4** Residue wise contact map for the four simulated systems (modelled MicroROSE,  $\Delta$ G10 MicroROSE, mutated A5U MicroROSE and mutated U25A MicroROSE) at 350 K.

## Contact map at 400K

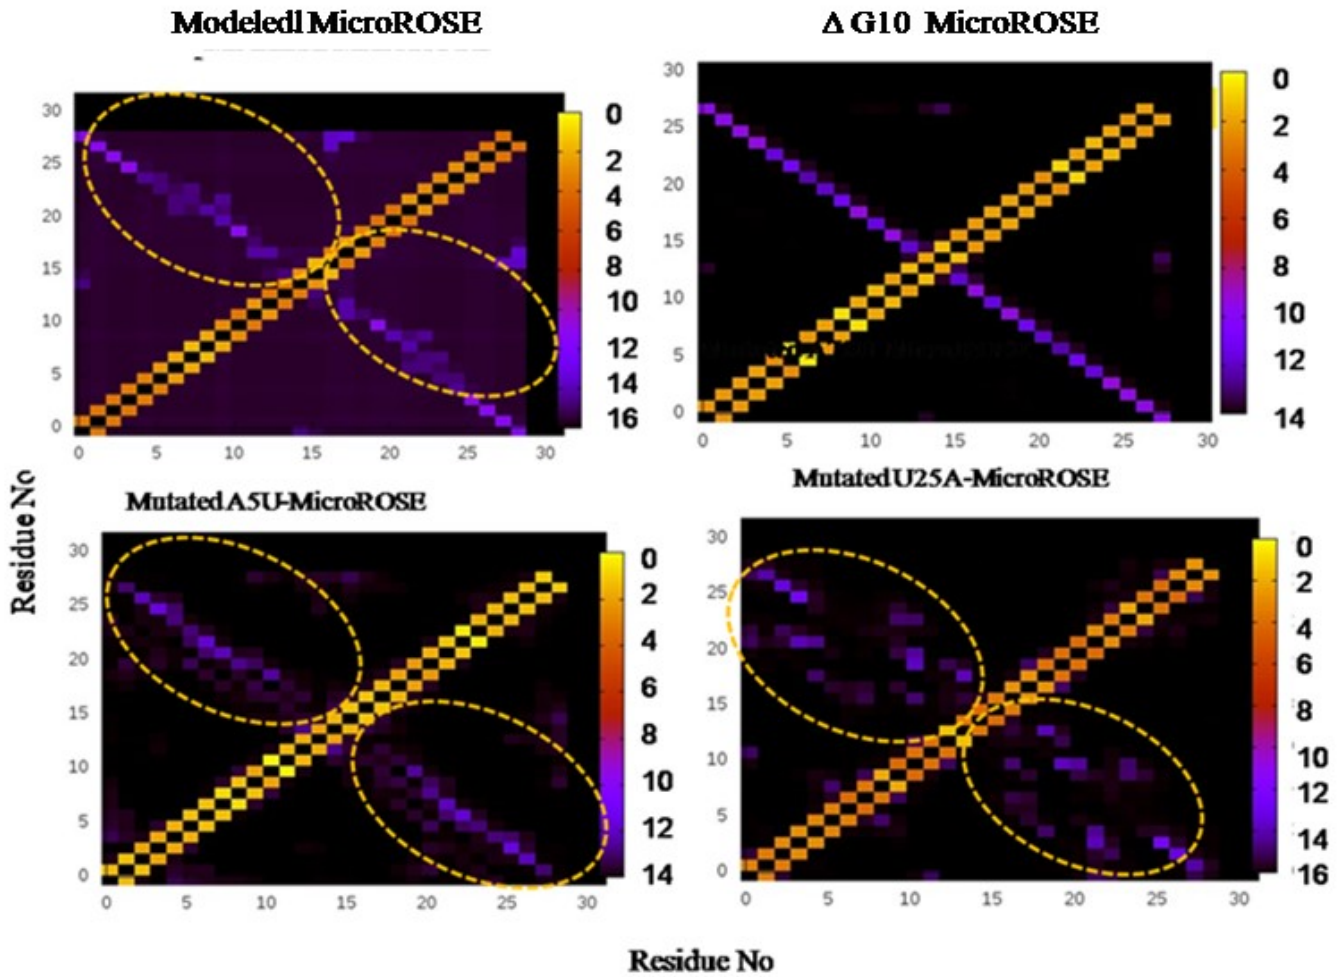

**Fig. S5** Residue wise contact map for the four simulated systems (modelled MicroROSE,  $\Delta G10$  MicroROSE, mutated A5U MicroROSE and mutated U25A MicroROSE) at 400 K.

At 315K

Modelled MicroROSE

Mutated A5U MicroROSE

Mutated U25A MicroROSE

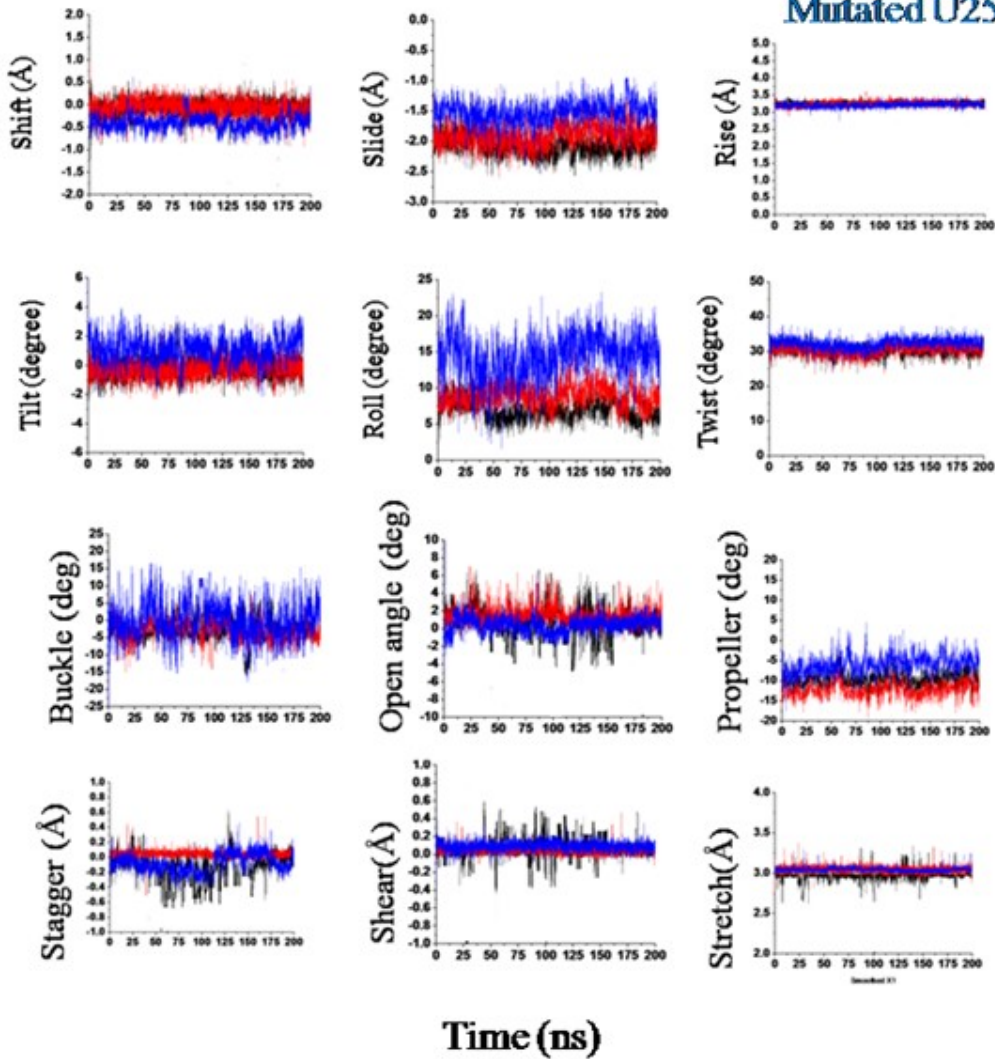

**Fig. S6** Trajectory of the six inter-base pair step parameters and the six intra base pair parameters for bases constituting the C4:G26-A5:U25, C4:G26-U5:U25 and C4:G26-A5:A25 base pairs step for modelled MicroROSE and both mutated MicroROSE systems respectively at 315 K.

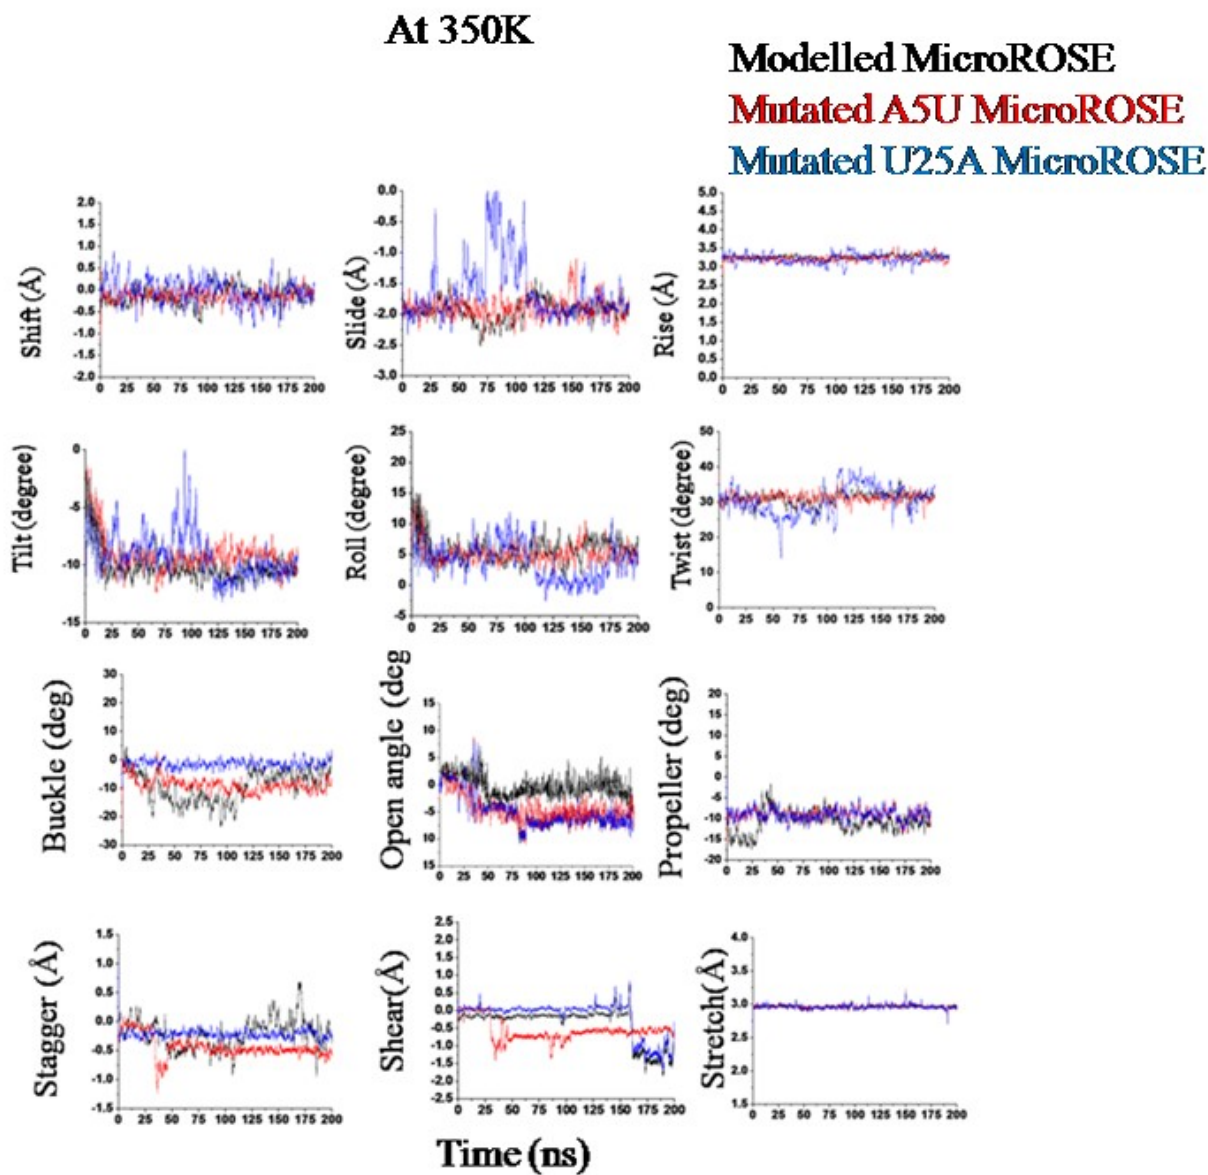

**Fig. S7** Trajectory of the six inter-base pair step parameters and the six intra base pair parameters for bases constituting the C4:G26-A5:U25, C4:G26-U5:U25 and C4:G26-A5:A25 base pairs step for modelled MicroROSE and both mutated MicroROSE systems respectively at 350 K.



**At 400K**

**Modelled MicroROSE**

**Mutated A5U MicroROSE**

**Mutated U25A MicroROSE**

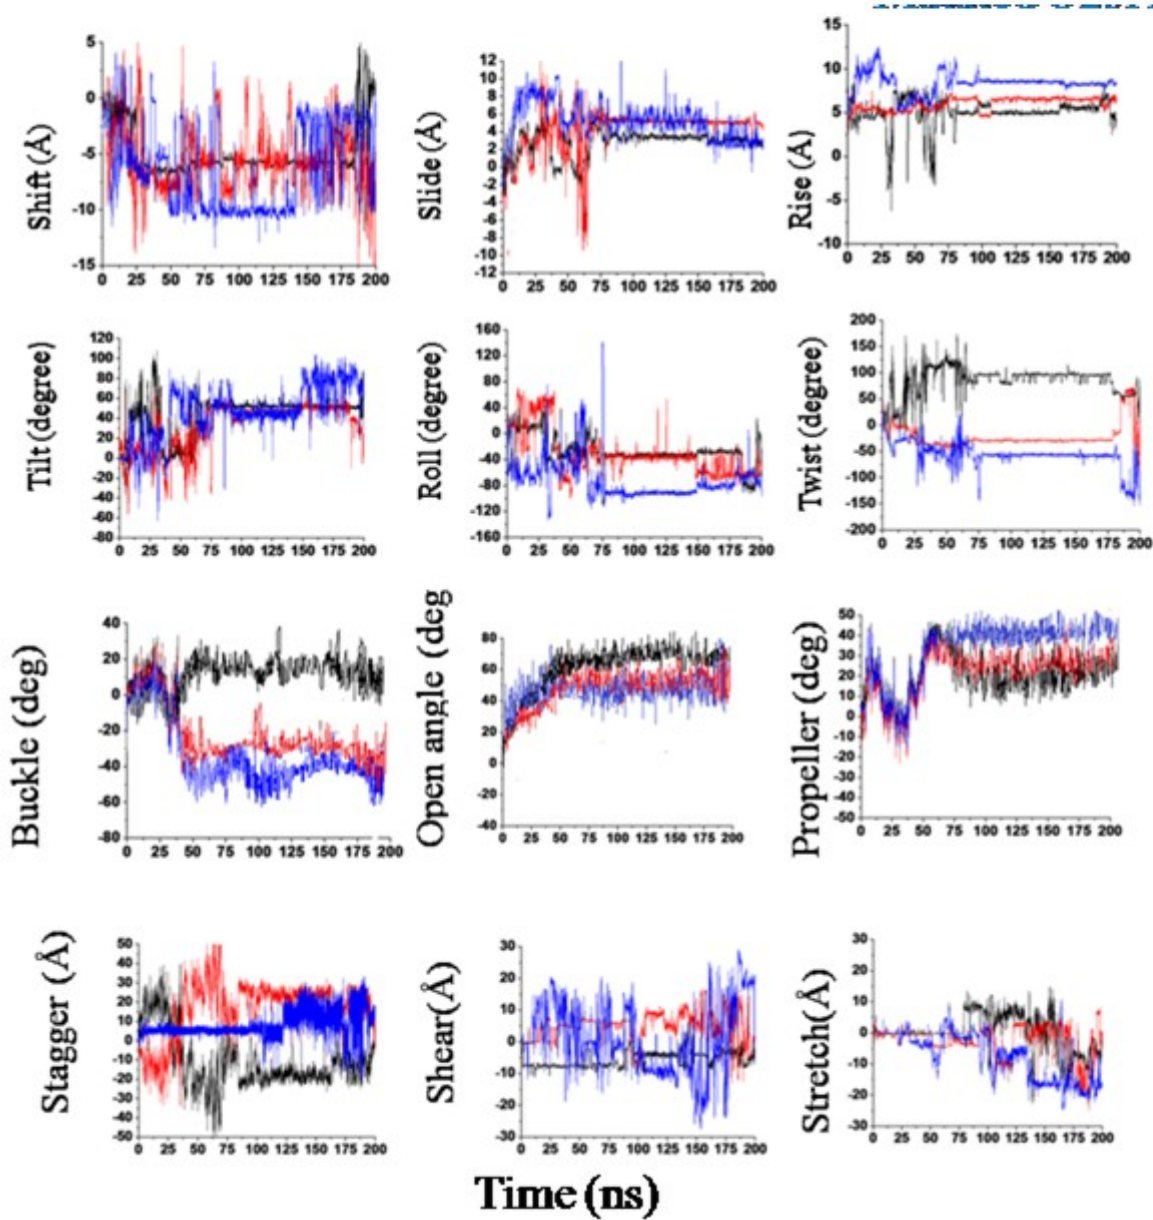

**Fig. S8** Trajectory of the six inter-base pair step parameters and the six intra base pair parameters for bases constituting the C4:G26-A5:U25, C4:G26-U5:U25 and C4:G26-A5:A25 base pairs step for modelled MicroROSE and both mutated MicroROSE systems respectively at 400 K.

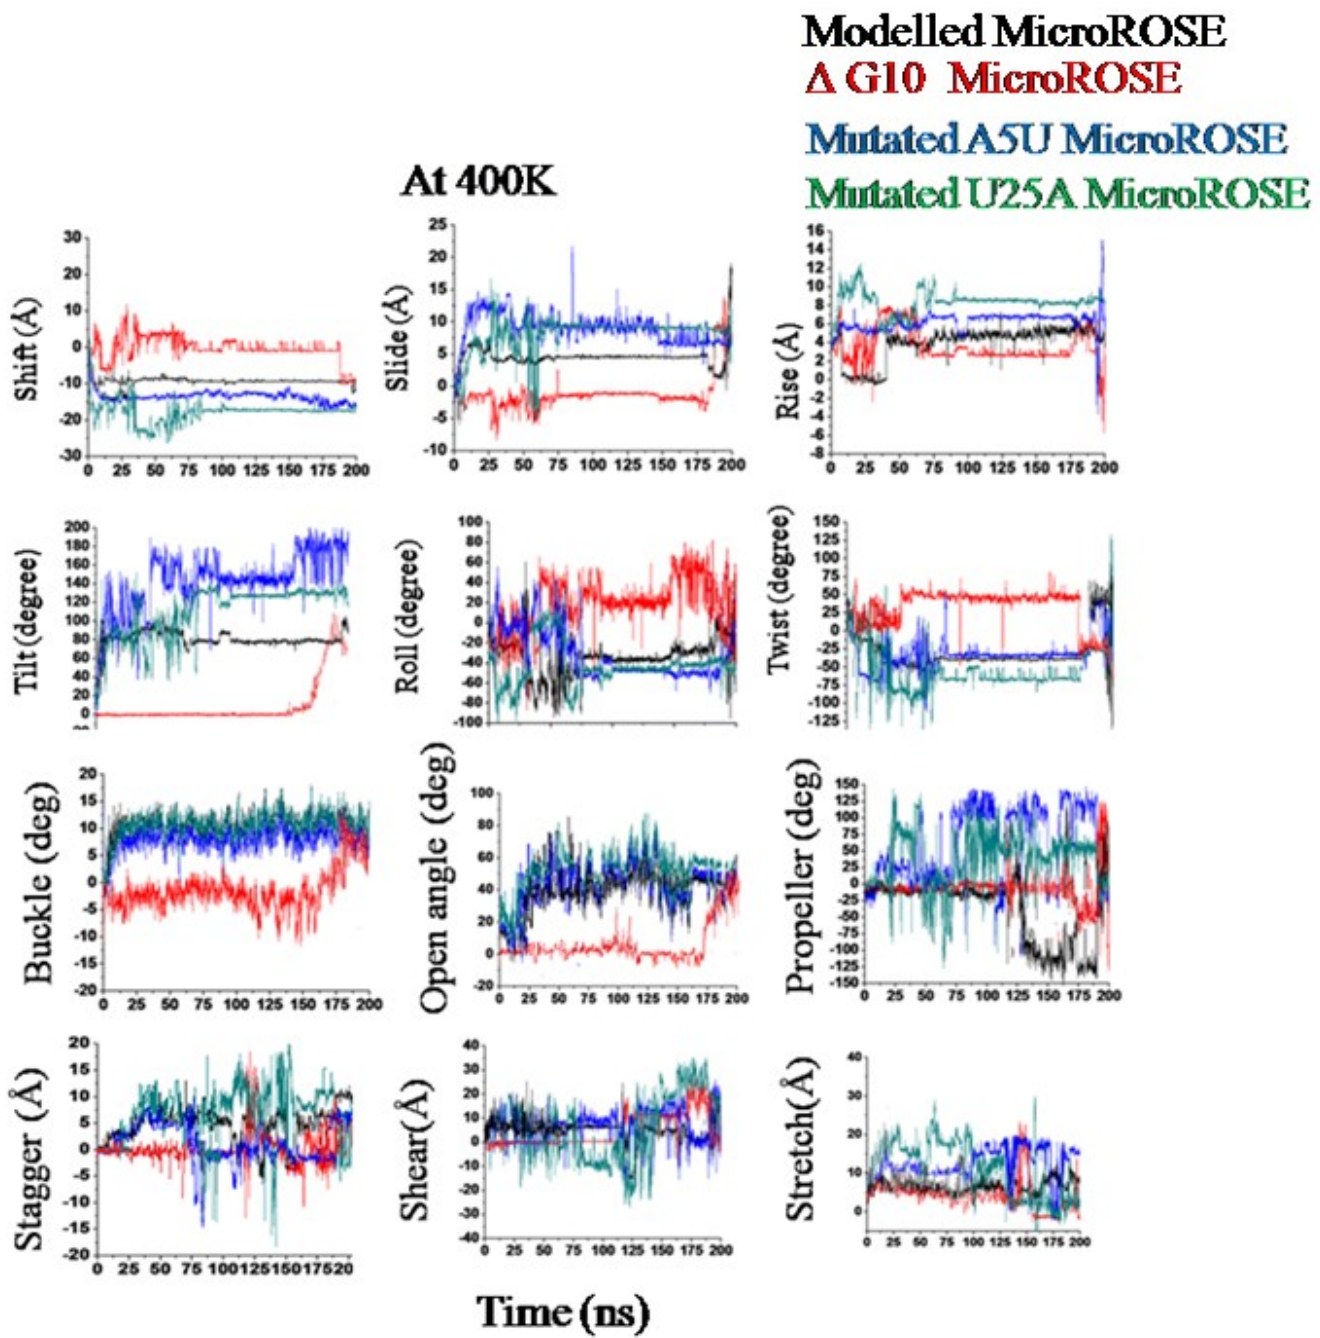

**Fig. S9** Trajectory of the six inter-base pair step parameters and the six intra base pair parameters for bases constituting the U8:A22-U9:G21 base pairs step for modelled MicroROSE,  $\Delta$ G10 MicroROSE, mutated A5U MicroROSE and mutated U25A MicroROSE) at 400 K.

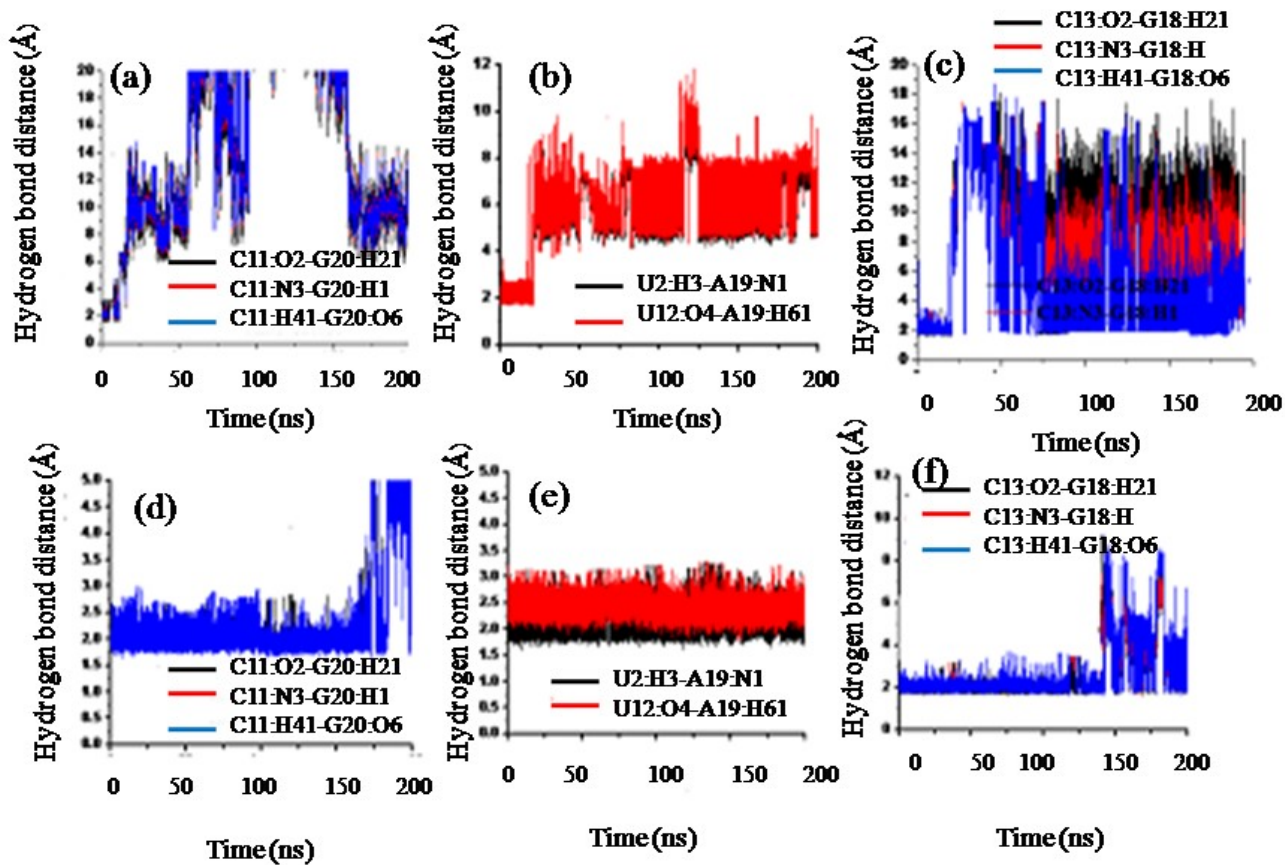

Fig. S10 Hydrogen bond distance plot with time of three Watson-Crick hydrogen bonds in modelled MicroROSE and  $\Delta$ G10 MicroROSE.
